# Supplementary material for: Digital Movement Therapy for Axial Spondyloarthritis: A Randomized Controlled Trial on Clinical Outcomes, Usability, and Costs
Source: Research Square preprint supplement (doi:10.21203/rs.3.rs-7361446/v1), 2025-09-18
Supplement: Supplementary file 1 [file d2c351fbc2b7f70f506b8cfe.docx]

**Supplementary Table S1:** Questionnaires

| **Questionnaires** | **Abbreviation** | **Unit** | **Range** | **Measurement** | **References** |
| --- | --- | --- | --- | --- | --- |
| **Health Assessment Questionnaire** | HAQ | Score | 0 to 3:  0-1 = mild to moderate disability,  1-2 = moderate to severe disability,  2-3 = severe to very severe disability | Extent of limitations in physical function | [22] |
| **Bath Ankylosing Spondylitis Functional Index** | BASFI | Score | 0 to 10:  0 = no limited function  10 = very limited function | Functional limitations, specific to the disease | [23] |
| **Work Productivity and Activity Impairment** | WPAI | Percentage | 0% to 100%:  higher percent means less work productivity and greater impairment | Effects of the chronic illness on the ability to work and the daily activities | [24] |
| **Pittsburgh Sleep Quality Index** | PSQI | Score | 0 to 10:  0-6 = good sleepers,  6-10 = poor sleepers,  10-21 = chronic sleep disorder | Sleep quality | [25] |
| **System Usability Scale** | SUS | Score | 0 to 100:  < 60% problems with usability  60-80% acceptable to good usability  > 80% good to excellent usability  100 % no problems with usability | Usability | [26] |
| **NET-Promoter Score** | NPS | Score and Scale | Score: -100 to 100:  higher scores indicate better acceptance  Scale: 0-10:  promoter 9/10  neutral 7/8  detractor 0-6 | Acceptance | [27] |
| **Technology Commitment** | TB | Score | 12 to 60:  The model is premised on 12 statements upon which respondents agree or disagree on a scale from 1 (fully agree) to 5 (fully disagree). The total score hence ranges from 12 to 60, with a high value corresponding to a higher general commitment to technology. | Affinity to technology | [28] |
| **Ankylosing Disease Activity Score** | ASDAS | Score | < 1.3 to > 3.5:  It's a composite score calculated from a patient's self-reported symptoms and inflammatory marker. The final score is interpreted on a scale from inactive disease to very high disease activity | Disease activity in ankylosing spondylitis | [29] |

**Supplementary Figure S1:** Patient Flow Diagram

Discontinued intervention (personal problems) (n=1)

Lost to follow-up for primary outcome (no response) (n=1):

Analysis

Analysed for primary outcome (n=30)

Excluded from analysis (give reasons) (n=0)

Discontinued intervention (personal problems) (n=3)

Lost to follow-up for primary outcome (no response) (n=3):

Excluded (n=7)

Not meeting inclusion criteria (n=0)

Declined to participate (n= 3)

Other reasons (n=4)

)

Randomised (n=63)

Allocation

Follow-Up

Allocated to intervention (n=31)

+ Received allocated intervention (n=31)

Allocated to intervention (n=32)

+ Received allocated intervention (n=32)

Enrolment

Assessed for eligibility (n= 70)

Analysed for primary outcome (n=29)

Excluded from analysis (give reasons) (n=0)
